# Supplementary material for: Regulation of Light Spectra on Cell Division of the Unicellular Green Alga Haematococcus pluvialis: Insights from Physiological and Lipidomic Analysis
Source: MDPI journal article supplement (doi:10.3390/cells11121956), 2022-06-17
Supplement: s1 [file s1]

## Supplementary Materials

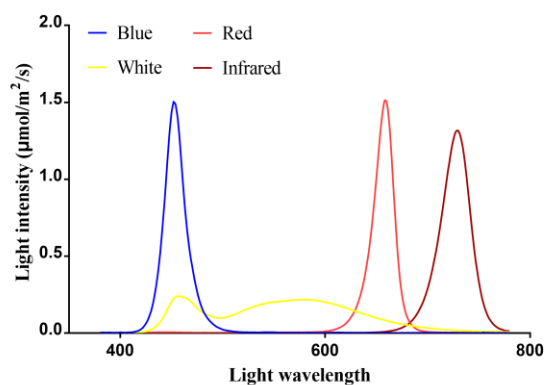

**Figure S1.** Blue, red, infrared and white light spectra used in this study (The blue and red light spectra presented here are mixed to obtain mixed blue/red lights).

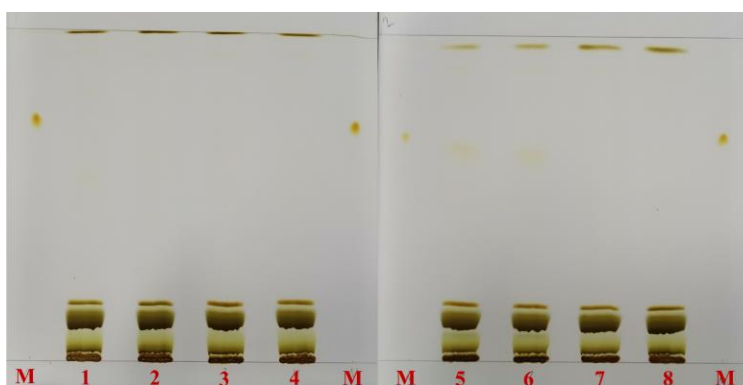

**Figure S2.** Thin layer chromatographic (TLC) analysis results of total lipids extracted from *H. pluvialis* green cells grown for 7 days under different light spectra. M: TAG standards used as marker; 1,2: Blue light group; 3,4: Blue/red 1/2 light group; 5,6: Red light group; 7,8: White light group. The spots scrapped off from TLC plates were analyzed by gas chromatography/mass spectrometry (GC/MS) after methyl esterification. Results showed that TAG accounted for  $0.035 \pm 0.003\%$ ,  $0.032 \pm 0.001\%$ ,  $0.052 \pm 0.012\%$  and  $0.035 \pm 0.003\%$  of the dry cell weights of *H. pluvialis* green cells grown under blue, blue/red 1/2, red and white lights, respectively.
